# Supplementary material
Source: publisher site journal article supplement (https://www.jstage.jst.go.jp/article/geochemj/47/2/47_2.0243/_supplement/_download/47_2.0243_1.pdf)
Supplement: Supplementary file 1 [file 47_2.0243_1.pdf]

Supplementary Table S1.1. U-Pb isotopic data for zircons from onland exposures determined by LA-ICP-MS

| Sample Name                                                  | Th/U | 207Pb/206Pb | Error 2σ | 206Pb/238U | Error 2σ | 207Pb/235U | Error 2σ | Disc** (%) | 238U-206Pb age (Ma) | Error 2σ | 235U-207Pb age (Ma) | Error 2σ |
|--------------------------------------------------------------|------|-------------|----------|------------|----------|------------|----------|------------|---------------------|----------|---------------------|----------|
| <b>TPD45 (Chile Margin Unit; matrix of pyroclastic rock)</b> |      |             |          |            |          |            |          |            |                     |          |                     |          |
| LATPD45-1                                                    | 0.84 | 0.3672 ±    | 0.0196   | 0.00128 ±  | 0.00004  | 0.0651 ±   | 0.0041   | -620       | 8.28 ±              | 0.29     | 64.0 ±              | 4.1      |
| LATPD45-2                                                    | 1.06 | 0.0740 ±    | 0.0109   | 0.00078 ±  | 0.00003  | 0.0080 ±   | 0.0012   | -32        | 5.04 ±              | 0.19     | 8.1 ±               | 1.2      |
| LATPD45-3                                                    | 1.66 | 0.0556 ±    | 0.0056   | 0.00073 ±  | 0.00002  | 0.0056 ±   | 0.0006   | -5         | 4.71 ±              | 0.14     | 5.67 ±              | 0.60     |
| LATPD45-4                                                    | 0.81 | 0.0493 ±    | 0.0026   | 0.01701 ±  | 0.00043  | 0.1155 ±   | 0.0067   | conc.      | 108.7 ±             | 2.7      | 111.0 ±             | 6.4      |
| LATPD45-5                                                    | 1.37 | 0.0598 ±    | 0.0076   | 0.00067 ±  | 0.00002  | 0.0056 ±   | 0.0007   | -9         | 4.35 ±              | 0.14     | 5.63 ±              | 0.74     |
| LATPD45-6                                                    | 0.88 | 0.0812 ±    | 0.0535   | 0.00205 ±  | 0.00019  | 0.0229 ±   | 0.0152   | conc.      | 13.2 ±              | 1.2      | 23 ±                | 15       |
| LATPD45-7                                                    | 0.70 | 0.0585 ±    | 0.0296   | 0.00068 ±  | 0.00004  | 0.0055 ±   | 0.0028   | conc.      | 4.35 ±              | 0.27     | 5.5 ±               | 2.8      |
| LATPD45-8                                                    | 0.76 | 0.1374 ±    | 0.0744   | 0.00080 ±  | 0.00009  | 0.0151 ±   | 0.0083   | -21        | 5.13 ±              | 0.57     | 15.2 ±              | 8.4      |
| LATPD45-9                                                    | 1.10 | 0.1084 ±    | 0.0163   | 0.00075 ±  | 0.00003  | 0.0112 ±   | 0.0017   | -94        | 4.84 ±              | 0.20     | 11.3 ±              | 1.8      |
| LATPD45-10                                                   | 0.40 | 0.0283 ±    | 0.0449   | 0.00079 ±  | 0.00006  | 0.0031 ±   | 0.0049   | conc.      | 5.06 ±              | 0.41     | 3.1 ±               | 4.9      |
| LATPD45-11                                                   | 1.19 | 0.0659 ±    | 0.0234   | 0.00070 ±  | 0.00004  | 0.0063 ±   | 0.0023   | conc.      | 4.48 ±              | 0.24     | 6.4 ±               | 2.3      |
| LATPD45-12                                                   | 1.05 | 0.0563 ±    | 0.0089   | 0.00070 ±  | 0.00002  | 0.0055 ±   | 0.0009   | conc.      | 4.53 ±              | 0.15     | 5.52 ±              | 0.89     |
| LATPD45-13                                                   | 0.60 | 0.0468 ±    | 0.0414   | 0.00075 ±  | 0.00006  | 0.0048 ±   | 0.0043   | conc.      | 4.82 ±              | 0.37     | 4.9 ±               | 4.3      |
| LATPD45-14                                                   | 0.39 | 0.0583 ±    | 0.0303   | 0.00073 ±  | 0.00005  | 0.0059 ±   | 0.0031   | conc.      | 4.70 ±              | 0.29     | 5.9 ±               | 3.1      |
| LATPD45-15                                                   | 1.27 | 0.0621 ±    | 0.0115   | 0.00073 ±  | 0.00003  | 0.0063 ±   | 0.0012   | -6         | 4.70 ±              | 0.17     | 6.3 ±               | 1.2      |
| LATPD45-16                                                   | 0.49 | 0.0841 ±    | 0.0684   | 0.00070 ±  | 0.00007  | 0.0082 ±   | 0.0067   | conc.      | 4.53 ±              | 0.43     | 8.2 ±               | 6.7      |
| LATPD45-17                                                   | 1.31 | 0.0517 ±    | 0.0121   | 0.00068 ±  | 0.00002  | 0.0048 ±   | 0.0012   | conc.      | 4.38 ±              | 0.16     | 4.9 ±               | 1.2      |
| LATPD45-18                                                   | 1.15 | 0.1044 ±    | 0.0145   | 0.00076 ±  | 0.00003  | 0.0110 ±   | 0.0016   | -90        | 4.90 ±              | 0.18     | 11.1 ±              | 1.6      |
| LATPD45-19                                                   | 1.63 | 0.0880 ±    | 0.0072   | 0.00079 ±  | 0.00002  | 0.0096 ±   | 0.0008   | -71        | 5.08 ±              | 0.14     | 9.68 ±              | 0.84     |
| LATPD45-20                                                   | 1.35 | 0.0651 ±    | 0.0115   | 0.00078 ±  | 0.00003  | 0.0070 ±   | 0.0013   | -12        | 5.01 ±              | 0.17     | 7.1 ±               | 1.3      |
| LATPD45-21                                                   | 1.64 | 0.0504 ±    | 0.0083   | 0.00069 ±  | 0.00002  | 0.0048 ±   | 0.0008   | conc.      | 4.43 ±              | 0.14     | 4.83 ±              | 0.81     |
| LATPD45-22                                                   | 1.74 | 0.0511 ±    | 0.0068   | 0.00073 ±  | 0.00002  | 0.0051 ±   | 0.0007   | conc.      | 4.69 ±              | 0.13     | 5.19 ±              | 0.71     |
| LATPD45-23                                                   | 1.15 | 0.0423 ±    | 0.0097   | 0.00072 ±  | 0.00002  | 0.0042 ±   | 0.0010   | conc.      | 4.65 ±              | 0.15     | 4.3 ±               | 1.0      |
| LATPD45-24                                                   | 0.47 | 0.0179 ±    | 0.0514   | 0.00073 ±  | 0.00006  | 0.0018 ±   | 0.0052   | conc.      | 4.72 ±              | 0.37     | 1.8 ±               | 5.3      |
| LATPD45-25                                                   | 1.27 | 0.0561 ±    | 0.0225   | 0.00075 ±  | 0.00003  | 0.0058 ±   | 0.0023   | conc.      | 4.82 ±              | 0.17     | 5.9 ±               | 2.4      |
| LATPD45-26                                                   | 1.03 | 0.1267 ±    | 0.0032   | 0.04809 ±  | 0.00071  | 0.8398 ±   | 0.0248   | -97        | 302.8 ±             | 4.5      | 619 ±               | 18       |
| LATPD45-27                                                   | 0.99 | 0.1121 ±    | 0.0192   | 0.00081 ±  | 0.00003  | 0.0125 ±   | 0.0022   | -97        | 5.21 ±              | 0.16     | 12.6 ±              | 2.2      |
| LATPD45-28                                                   | 1.05 | 0.0587 ±    | 0.0119   | 0.00071 ±  | 0.00002  | 0.0058 ±   | 0.0012   | conc.      | 4.60 ±              | 0.12     | 5.9 ±               | 1.2      |
| LATPD45-29                                                   | 1.13 | 0.0476 ±    | 0.0181   | 0.00072 ±  | 0.00002  | 0.0047 ±   | 0.0018   | conc.      | 4.66 ±              | 0.15     | 4.8 ±               | 1.8      |
| LATPD45-30                                                   | 1.04 | 0.0823 ±    | 0.0240   | 0.00072 ±  | 0.00003  | 0.0082 ±   | 0.0024   | -22        | 4.64 ±              | 0.17     | 8.3 ±               | 2.4      |

**TPD85 (Chile Margin Unit; dacite clast)**

|            |      |                 |                   |                 |       |              |             |
|------------|------|-----------------|-------------------|-----------------|-------|--------------|-------------|
| LATPD85-1  | 0.41 | 0.0399 ± 0.0940 | 0.00076 ± 0.00008 | 0.0042 ± 0.0098 | conc. | 4.88 ± 0.49  | 4.2 ± 9.9   |
| LATPD85-2  | 0.57 | 0.0549 ± 0.1219 | 0.00083 ± 0.00010 | 0.0063 ± 0.0139 | conc. | 5.34 ± 0.67  | 6 ± 14      |
| LATPD85-3  | 0.58 | 0.0415 ± 0.1194 | 0.00070 ± 0.00009 | 0.0040 ± 0.0115 | conc. | 4.51 ± 0.56  | 4 ± 12      |
| LATPD85-4  | 0.33 | 0.0705 ± 0.1891 | 0.00086 ± 0.00016 | 0.0084 ± 0.0225 | conc. | 5.5 ± 1.0    | 8 ± 23      |
| LATPD85-5  | 0.51 | 0.1065 ± 0.0746 | 0.00077 ± 0.00006 | 0.0114 ± 0.0080 | conc. | 4.98 ± 0.41  | 11.5 ± 8.1  |
| LATPD85-6  | 0.38 | 0.7779 ± 0.0466 | 0.00566 ± 0.00022 | 0.6073 ± 0.0434 | -1125 | 36.4 ± 1.4   | 482 ± 34    |
| LATPD85-7  | 0.43 | 0.0803 ± 0.1605 | 0.00074 ± 0.00012 | 0.0082 ± 0.0165 | conc. | 4.79 ± 0.76  | 8 ± 17      |
| LATPD85-8  | 0.37 | 0.1050 ± 0.1395 | 0.00085 ± 0.00012 | 0.0123 ± 0.0164 | conc. | 5.48 ± 0.77  | 12 ± 17     |
| LATPD85-9  | 0.65 | 0.0858 ± 0.1066 | 0.00073 ± 0.00008 | 0.0086 ± 0.0108 | conc. | 4.70 ± 0.52  | 9 ± 11      |
| LATPD85-10 | 0.73 | 0.0605 ± 0.0211 | 0.00073 ± 0.00004 | 0.0061 ± 0.0022 | conc. | 4.73 ± 0.26  | 6.2 ± 2.2   |
| LATPD85-11 | 0.87 | 0.0687 ± 0.0168 | 0.00070 ± 0.00003 | 0.0067 ± 0.0017 | -7    | 4.53 ± 0.21  | 6.7 ± 1.7   |
| LATPD85-12 | 0.30 | 0.0307 ± 0.0368 | 0.00069 ± 0.00005 | 0.0029 ± 0.0035 | conc. | 4.42 ± 0.35  | 2.9 ± 3.5   |
| LATPD85-13 | 0.35 | 0.0488 ± 0.0767 | 0.00065 ± 0.00009 | 0.0044 ± 0.0069 | conc. | 4.18 ± 0.57  | 4.4 ± 7.0   |
| LATPD85-14 | 0.97 | 0.0488 ± 0.0180 | 0.00072 ± 0.00004 | 0.0049 ± 0.0018 | conc. | 4.65 ± 0.23  | 4.9 ± 1.8   |
| LATPD85-15 | 0.40 | 0.0466 ± 0.0427 | 0.00069 ± 0.00006 | 0.0044 ± 0.0041 | conc. | 4.45 ± 0.39  | 4.5 ± 4.1   |
| LATPD85-16 | 0.79 | 0.0614 ± 0.0227 | 0.00075 ± 0.00004 | 0.0063 ± 0.0024 | conc. | 4.82 ± 0.27  | 6.4 ± 2.4   |
| LATPD85-17 | 0.29 | 0.0630 ± 0.0430 | 0.00080 ± 0.00007 | 0.0069 ± 0.0048 | conc. | 5.15 ± 0.45  | 7.0 ± 4.8   |
| LATPD85-18 | 0.36 | 0.2965 ± 0.0566 | 0.00113 ± 0.00010 | 0.0462 ± 0.0097 | -389  | 7.27 ± 0.63  | 45.8 ± 9.6  |
| LATPD85-19 | 0.99 | 0.1519 ± 0.0562 | 0.00080 ± 0.00008 | 0.0168 ± 0.0064 | -91   | 5.15 ± 0.54  | 16.9 ± 6.5  |
| LATPD85-20 | 0.89 | 0.0626 ± 0.0235 | 0.00078 ± 0.00005 | 0.0067 ± 0.0026 | conc. | 5.00 ± 0.32  | 6.8 ± 2.6   |
| LATPD85-21 | 0.43 | 0.7131 ± 0.0396 | 0.00594 ± 0.00027 | 0.5845 ± 0.0418 | -1031 | 38.2 ± 1.7   | 467 ± 33    |
| LATPD85-22 | 0.81 | 0.0566 ± 0.0140 | 0.00072 ± 0.00003 | 0.0056 ± 0.0014 | conc. | 4.65 ± 0.22  | 5.7 ± 1.4   |
| LATPD85-23 | 0.68 | 0.0423 ± 0.0250 | 0.00075 ± 0.00005 | 0.0044 ± 0.0026 | conc. | 4.86 ± 0.32  | 4.4 ± 2.6   |
| LATPD85-24 | 0.39 | 0.0710 ± 0.0459 | 0.00073 ± 0.00007 | 0.0072 ± 0.0047 | conc. | 4.72 ± 0.46  | 7.3 ± 4.7   |
| LATPD85-25 | 0.39 | 0.0910 ± 0.0330 | 0.00075 ± 0.00006 | 0.0094 ± 0.0035 | -16   | 4.84 ± 0.37  | 9.5 ± 3.5   |
| LATPD85-26 | 0.36 | 0.1394 ± 0.0782 | 0.00080 ± 0.00011 | 0.0154 ± 0.0089 | -13   | 5.15 ± 0.72  | 15.5 ± 9.0  |
| LATPD85-27 | 0.38 | 0.0637 ± 0.0394 | 0.00073 ± 0.00006 | 0.0064 ± 0.0040 | conc. | 4.69 ± 0.41  | 6.5 ± 4.0   |
| LATPD85-28 | 0.84 | 0.0958 ± 0.0340 | 0.00071 ± 0.00005 | 0.0094 ± 0.0034 | -26   | 4.59 ± 0.31  | 9.5 ± 3.4   |
| LATPD85-29 | 0.48 | 0.0440 ± 0.0315 | 0.00081 ± 0.00005 | 0.0049 ± 0.0035 | conc. | 5.23 ± 0.35  | 5.0 ± 3.6   |
| LATPD85-30 | 0.90 | 0.5461 ± 0.0307 | 0.00202 ± 0.00008 | 0.1521 ± 0.0104 | -925  | 13.01 ± 0.51 | 143.8 ± 9.9 |

**TPD159 (Pan de Azucar)**

|             |      |                 |                   |                 |       |             |             |
|-------------|------|-----------------|-------------------|-----------------|-------|-------------|-------------|
| LATPD159-1  | 0.47 | 0.1481 ± 0.1723 | 0.00080 ± 0.00011 | 0.0163 ± 0.0191 | conc. | 5.14 ± 0.72 | 16 ± 19     |
| LATPD159-2  | 0.76 | 0.0707 ± 0.0765 | 0.00066 ± 0.00005 | 0.0064 ± 0.0069 | conc. | 4.23 ± 0.35 | 6.5 ± 7.0   |
| LATPD159-3  | 0.16 | 0.0736 ± 0.0020 | 0.09282 ± 0.00391 | 0.9421 ± 0.0472 | -8    | 572 ± 24    | 674 ± 34    |
| LATPD159-4  | 0.86 | 0.0307 ± 0.0469 | 0.00063 ± 0.00004 | 0.0027 ± 0.0041 | conc. | 4.1 ± 0.3   | 2.7 ± 4.2   |
| LATPD159-5  | 0.69 | 0.1417 ± 0.0997 | 0.00076 ± 0.00007 | 0.0149 ± 0.0106 | conc. | 4.9 ± 0.5   | 15 ± 11     |
| LATPD159-6  | 0.60 | 0.0587 ± 0.1169 | 0.00091 ± 0.00009 | 0.0074 ± 0.0147 | conc. | 5.9 ± 0.6   | 7 ± 15      |
| LATPD159-7  | 1.55 | 0.0512 ± 0.0024 | 0.04111 ± 0.00070 | 0.2900 ± 0.0143 | conc. | 259.7 ± 4.4 | 259 ± 13    |
| LATPD159-8  | 1.06 | 0.0621 ± 0.0228 | 0.00070 ± 0.00003 | 0.0060 ± 0.0022 | conc. | 4.50 ± 0.16 | 6.0 ± 2.2   |
| LATPD159-9  | 1.03 | 0.0473 ± 0.0235 | 0.00069 ± 0.00003 | 0.0045 ± 0.0022 | conc. | 4.44 ± 0.16 | 4.6 ± 2.3   |
| LATPD159-10 | 0.55 | 0.0591 ± 0.0014 | 0.09097 ± 0.00144 | 0.7407 ± 0.0213 | conc. | 561.2 ± 8.9 | 563 ± 16    |
| LATPD159-11 | 0.54 | 0.0616 ± 0.0199 | 0.01558 ± 0.00049 | 0.1324 ± 0.0430 | conc. | 99.6 ± 3.2  | 126 ± 41    |
| LATPD159-12 | 0.50 | 0.0684 ± 0.0049 | 0.07989 ± 0.00177 | 0.7533 ± 0.0569 | -4    | 495 ± 11    | 570 ± 43    |
| LATPD159-13 | 0.58 | 0.0628 ± 0.0051 | 0.07323 ± 0.00163 | 0.6338 ± 0.0534 | conc. | 456 ± 10    | 498 ± 42    |
| LATPD159-14 | 0.49 | 0.0476 ± 0.0042 | 0.02120 ± 0.00046 | 0.1390 ± 0.0125 | conc. | 135.2 ± 2.9 | 132 ± 12    |
| LATPD159-15 | 0.75 | 0.0515 ± 0.0023 | 0.03670 ± 0.00074 | 0.2605 ± 0.0126 | conc. | 232.3 ± 4.7 | 235 ± 11    |
| LATPD159-16 | 0.56 | 0.0559 ± 0.0087 | 0.01602 ± 0.00040 | 0.1236 ± 0.0195 | conc. | 102.5 ± 2.5 | 118 ± 19    |
| LATPD159-17 | 0.09 | 0.1031 ± 0.1000 | 0.00073 ± 0.00005 | 0.0104 ± 0.0101 | conc. | 4.69 ± 0.31 | 10 ± 10     |
| LATPD159-18 | 0.56 | 0.0495 ± 0.0033 | 0.01862 ± 0.00039 | 0.1270 ± 0.0090 | conc. | 118.9 ± 2.5 | 121.4 ± 8.6 |
| LATPD159-19 | 0.63 | 0.0554 ± 0.0016 | 0.06018 ± 0.00118 | 0.4599 ± 0.0158 | conc. | 376.7 ± 7.4 | 384 ± 13    |
| LATPD159-20 | 0.39 | 0.0747 ± 0.0016 | 0.13340 ± 0.00411 | 1.3745 ± 0.0517 | -2    | 807 ± 25    | 878 ± 33    |
| LATPD159-21 | 0.33 | 0.0654 ± 0.0008 | 0.11369 ± 0.00346 | 1.0258 ± 0.0339 | conc. | 694 ± 21    | 717 ± 24    |
| LATPD159-22 | 0.60 | 0.0524 ± 0.0030 | 0.04036 ± 0.00129 | 0.2915 ± 0.0192 | conc. | 255.1 ± 8.2 | 260 ± 17    |
| LATPD159-23 | 1.13 | 0.0589 ± 0.0149 | 0.00447 ± 0.00019 | 0.0363 ± 0.0093 | conc. | 28.7 ± 1.2  | 36.2 ± 9.3  |
| LATPD159-24 | 0.44 | 0.0514 ± 0.0021 | 0.03325 ± 0.00104 | 0.2357 ± 0.0123 | conc. | 210.8 ± 6.6 | 215 ± 11    |
| LATPD159-25 | 0.73 | 0.0762 ± 0.0645 | 0.00066 ± 0.00006 | 0.0070 ± 0.0059 | conc. | 4.28 ± 0.41 | 7.1 ± 6.0   |
| LATPD159-26 | 1.03 | 0.0633 ± 0.0279 | 0.00067 ± 0.00004 | 0.0059 ± 0.0026 | conc. | 4.35 ± 0.24 | 6.0 ± 2.6   |
| LATPD159-27 | 1.11 | 0.0484 ± 0.0024 | 0.01408 ± 0.00044 | 0.0940 ± 0.0055 | conc. | 90.1 ± 2.8  | 91.2 ± 5.4  |
| LATPD159-28 | 0.68 | 0.0801 ± 0.0659 | 0.00093 ± 0.00009 | 0.0103 ± 0.0085 | conc. | 6.01 ± 0.58 | 10.4 ± 8.6  |

**TPD129 (Fjordo San Pedro)**

|             |      |                 |                   |                 |       |             |             |
|-------------|------|-----------------|-------------------|-----------------|-------|-------------|-------------|
| LATPD129-1  | 0.66 | 0.0585 ± 0.0052 | 0.01359 ± 0.00054 | 0.1096 ± 0.0107 | -5    | 87.0 ± 3.5  | 106 ± 10    |
| LATPD129-2  | 0.36 | 0.0720 ± 0.0012 | 0.13011 ± 0.00464 | 1.2917 ± 0.0511 | conc. | 789 ± 28    | 842 ± 33    |
| LATPD129-3  | 0.51 | 0.0530 ± 0.0013 | 0.04673 ± 0.00167 | 0.3413 ± 0.0150 | conc. | 294 ± 11    | 298 ± 13    |
| LATPD129-4  | 0.49 | 0.0520 ± 0.0017 | 0.01586 ± 0.00057 | 0.1138 ± 0.0056 | conc. | 101.4 ± 3.7 | 109.4 ± 5.4 |
| LATPD129-5  | 0.40 | 0.1025 ± 0.0488 | 0.00044 ± 0.00005 | 0.0062 ± 0.0030 | -3    | 2.84 ± 0.31 | 6.3 ± 3.1   |
| LATPD129-6  | 0.52 | 0.1163 ± 0.0683 | 0.00044 ± 0.00006 | 0.0071 ± 0.0043 | conc. | 2.86 ± 0.40 | 7.2 ± 4.3   |
| LATPD129-7  | 0.52 | 0.2848 ± 0.0902 | 0.00043 ± 0.00007 | 0.0167 ± 0.0059 | -281  | 2.74 ± 0.43 | 16.8 ± 5.9  |
| LATPD129-8  | 0.50 | 0.1229 ± 0.0989 | 0.00036 ± 0.00007 | 0.0061 ± 0.0050 | conc. | 2.32 ± 0.45 | 6.2 ± 5.1   |
| LATPD129-9  | 1.09 | 0.0327 ± 0.0135 | 0.00045 ± 0.00002 | 0.0020 ± 0.0009 | conc. | 2.92 ± 0.16 | 2.07 ± 0.86 |
| LATPD129-10 | 0.70 | 0.0408 ± 0.0662 | 0.00046 ± 0.00004 | 0.0026 ± 0.0042 | conc. | 2.94 ± 0.27 | 2.6 ± 4.2   |
| LATPD129-11 | 0.76 | 0.1484 ± 0.0593 | 0.00051 ± 0.00004 | 0.0104 ± 0.0042 | -81   | 3.27 ± 0.27 | 10.5 ± 4.3  |
| LATPD129-12 | 0.75 | 0.1462 ± 0.0636 | 0.00047 ± 0.00004 | 0.0095 ± 0.0042 | -67   | 3.02 ± 0.27 | 9.6 ± 4.2   |
| LATPD129-13 | 0.34 | 0.0563 ± 0.0020 | 0.05169 ± 0.00201 | 0.4009 ± 0.0213 | conc. | 325 ± 13    | 342 ± 18    |
| LATPD129-14 | 0.53 | 0.0701 ± 0.0478 | 0.00042 ± 0.00003 | 0.0040 ± 0.0028 | conc. | 2.68 ± 0.21 | 4.1 ± 2.8   |
| LATPD129-15 | 0.57 | 0.0993 ± 0.0640 | 0.00042 ± 0.00004 | 0.0057 ± 0.0037 | conc. | 2.70 ± 0.24 | 5.8 ± 3.8   |
| LATPD129-16 | 1.15 | 0.0638 ± 0.0448 | 0.00051 ± 0.00004 | 0.0045 ± 0.0032 | conc. | 3.29 ± 0.24 | 4.5 ± 3.2   |
| LATPD129-17 | 1.14 | 0.0813 ± 0.0483 | 0.00043 ± 0.00003 | 0.0048 ± 0.0029 | conc. | 2.78 ± 0.21 | 4.9 ± 2.9   |
| LATPD129-18 | 0.33 | 0.0777 ± 0.1805 | 0.00042 ± 0.00008 | 0.0045 ± 0.0105 | conc. | 2.70 ± 0.50 | 5 ± 11      |
| LATPD129-19 | 0.54 | 0.0798 ± 0.0015 | 0.18762 ± 0.00840 | 2.0644 ± 0.1003 | conc. | 1108 ± 50   | 1137 ± 55   |
| LATPD129-20 | 0.49 | 0.0535 ± 0.0044 | 0.02002 ± 0.00094 | 0.1476 ± 0.0141 | conc. | 127.8 ± 6.0 | 140 ± 13    |
| LATPD129-21 | 0.58 | 0.0512 ± 0.0033 | 0.04644 ± 0.00215 | 0.3281 ± 0.0259 | conc. | 293 ± 14    | 288 ± 23    |
| LATPD129-22 | 0.49 | 0.0800 ± 0.0213 | 0.00247 ± 0.00015 | 0.0272 ± 0.0075 | -18   | 15.9 ± 1.0  | 27.3 ± 7.5  |
| LATPD129-23 | 0.62 | 0.1021 ± 0.0304 | 0.00054 ± 0.00004 | 0.0076 ± 0.0023 | -47   | 3.46 ± 0.24 | 7.6 ± 2.3   |
| LATPD129-24 | 0.74 | 0.0540 ± 0.0052 | 0.01452 ± 0.00070 | 0.1080 ± 0.0117 | conc. | 92.9 ± 4.4  | 104 ± 11    |
| LATPD129-25 | 0.12 | 0.0714 ± 0.0017 | 0.13434 ± 0.00603 | 1.3224 ± 0.0671 | conc. | 813 ± 36    | 856 ± 43    |
| LATPD129-26 | 0.35 | 0.1819 ± 0.0034 | 0.22820 ± 0.01025 | 5.7239 ± 0.2790 | -34   | 1325 ± 60   | 1935 ± 94   |
| LATPD129-27 | 0.72 | 0.0651 ± 0.0018 | 0.06455 ± 0.00291 | 0.5795 ± 0.0307 | -4    | 403 ± 18    | 464 ± 25    |
| LATPD129-28 | 0.63 | 0.0695 ± 0.0019 | 0.12928 ± 0.00258 | 1.2390 ± 0.0417 | conc. | 784 ± 16    | 818 ± 28    |
| LATPD129-29 | 0.33 | 0.0587 ± 0.0010 | 0.07517 ± 0.00144 | 0.6082 ± 0.0157 | conc. | 467.2 ± 8.9 | 482 ± 12    |
| LATPD129-30 | 0.47 | 0.1280 ± 0.0245 | 0.00068 ± 0.00004 | 0.0119 ± 0.0024 | -116  | 4.36 ± 0.24 | 12.0 ± 2.4  |
| LATPD129-31 | 0.45 | 0.0856 ± 0.0015 | 0.17434 ± 0.00336 | 2.0567 ± 0.0535 | -5    | 1036 ± 20   | 1134 ± 30   |
| LATPD129-32 | 1.11 | 0.0508 ± 0.0012 | 0.03920 ± 0.00076 | 0.2748 ± 0.0084 | conc. | 247.8 ± 4.8 | 246.5 ± 7.6 |
| LATPD129-33 | 0.42 | 0.0487 ± 0.0039 | 0.01420 ± 0.00035 | 0.0954 ± 0.0079 | conc. | 90.9 ± 2.2  | 92.5 ± 7.7  |
| LATPD129-34 | 0.50 | 0.0577 ± 0.0014 | 0.08318 ± 0.00162 | 0.6622 ± 0.0202 | conc. | 515 ± 10    | 516 ± 16    |
| LATPD129-35 | 0.71 | 0.0743 ± 0.0009 | 0.14877 ± 0.00282 | 1.5245 ± 0.0348 | -1    | 894 ± 17    | 940 ± 21    |
| LATPD129-36 | 0.73 | 0.0538 ± 0.0046 | 0.02948 ± 0.00076 | 0.2185 ± 0.0194 | conc. | 187.3 ± 4.8 | 201 ± 18    |

\* Percentage of <sup>206</sup>Pb contributed by common Pb on the basis of <sup>204</sup>Pb. Value of common Pb was assumed by Stacey and Kramers (1975) model; n.d. : no detection of <sup>204</sup>Pb.

\*\* Degree of discordance (%); negative numbers and blanks show normal discordant and concordance within 2σ of the analytical error, respectively.

Supplementary Table S1.2. U-Pb isotopic data for zircons from dredged samples determined by LA-ICP-MS

| Sample Name              | Th/U | 207Pb/206Pb | Error<br>2σ | 206Pb/238U | Error<br>2σ | 207Pb/235U | Error<br>2σ | Disc**<br>(%) | 238U-206Pb<br>age (Ma) | Error<br>2σ | 235U-207Pb<br>age (Ma) | Error<br>2σ |
|--------------------------|------|-------------|-------------|------------|-------------|------------|-------------|---------------|------------------------|-------------|------------------------|-------------|
| <b>D02-G01 (Granite)</b> |      |             |             |            |             |            |             |               |                        |             |                        |             |
| LAD02-G01-1              | 1.37 | 0.0727 ±    | 0.0212      | 0.00063 ±  | 0.00003     | 0.0063 ±   | 0.0019      | -6            | 4.08 ±                 | 0.21        | 6.4 ±                  | 1.9         |
| LAD02-G01-2              | 1.55 | 0.4217 ±    | 0.0355      | 0.00110 ±  | 0.00005     | 0.0640 ±   | 0.0062      | -697          | 7.10 ±                 | 0.34        | 63.0 ±                 | 6.1         |
| LAD02-G01-3              | 0.62 | 0.3570 ±    | 0.1125      | 0.00074 ±  | 0.00010     | 0.0364 ±   | 0.0125      | -386          | 4.77 ±                 | 0.66        | 36 ±                   | 13          |
| LAD02-G01-4              | 0.47 | 0.0580 ±    | 0.0031      | 0.02973 ±  | 0.00073     | 0.2377 ±   | 0.0140      | -5            | 188.9 ±                | 4.7         | 217 ±                  | 13          |
| LAD02-G01-5              | 0.75 | 0.0481 ±    | 0.0482      | 0.00078 ±  | 0.00007     | 0.0052 ±   | 0.0052      | conc.         | 5.04 ±                 | 0.44        | 5.3 ±                  | 5.3         |
| LAD02-G01-6              | 0.36 | 0.1131 ±    | 0.0447      | 0.00072 ±  | 0.00006     | 0.0113 ±   | 0.0045      | -38           | 4.67 ±                 | 0.37        | 11.4 ±                 | 4.6         |
| LAD02-G01-7              | 0.61 | 0.1408 ±    | 0.0694      | 0.00072 ±  | 0.00008     | 0.0139 ±   | 0.0070      | -40           | 4.61 ±                 | 0.50        | 14.0 ±                 | 7.1         |
| LAD02-G01-8              | 0.41 | 0.1223 ±    | 0.0995      | 0.00071 ±  | 0.00010     | 0.0120 ±   | 0.0099      | conc.         | 4.57 ±                 | 0.66        | 12 ±                   | 10          |
| LAD02-G01-9              | 0.41 | 0.0932 ±    | 0.0436      | 0.00075 ±  | 0.00006     | 0.0096 ±   | 0.0046      | conc.         | 4.81 ±                 | 0.41        | 9.7 ±                  | 4.6         |
| LAD02-G01-10             | 0.56 | 0.0968 ±    | 0.0365      | 0.00074 ±  | 0.00006     | 0.0099 ±   | 0.0038      | -21           | 4.79 ±                 | 0.36        | 10.0 ±                 | 3.9         |
| LAD02-G01-11             | 0.44 | 0.1737 ±    | 0.0566      | 0.00081 ±  | 0.00008     | 0.0194 ±   | 0.0066      | -137          | 5.22 ±                 | 0.49        | 19.5 ±                 | 6.6         |
| LAD02-G01-13             | 0.64 | 0.2593 ±    | 0.0404      | 0.00082 ±  | 0.00005     | 0.0294 ±   | 0.0050      | -355          | 5.30 ±                 | 0.35        | 29.4 ±                 | 5.0         |
| LAD02-G01-14             | 0.50 | 0.1517 ±    | 0.0445      | 0.00063 ±  | 0.00005     | 0.0132 ±   | 0.0040      | -120          | 4.07 ±                 | 0.33        | 13.3 ±                 | 4.1         |
| LAD02-G01-15             | 0.69 | 0.1169 ±    | 0.0297      | 0.00072 ±  | 0.00005     | 0.0115 ±   | 0.0030      | -80           | 4.61 ±                 | 0.30        | 11.6 ±                 | 3.1         |
| LAD02-G01-16             | 0.56 | 0.1829 ±    | 0.0391      | 0.00070 ±  | 0.00005     | 0.0178 ±   | 0.0040      | -198          | 4.54 ±                 | 0.33        | 17.9 ±                 | 4.0         |
| LAD02-G01-17             | 0.42 | 0.2068 ±    | 0.0549      | 0.00084 ±  | 0.00008     | 0.0240 ±   | 0.0067      | -211          | 5.43 ±                 | 0.48        | 24.1 ±                 | 6.8         |
| LAD02-G01-18             | 0.77 | 0.1009 ±    | 0.0264      | 0.00083 ±  | 0.00005     | 0.0115 ±   | 0.0031      | -53           | 5.33 ±                 | 0.33        | 11.6 ±                 | 3.1         |
| LAD02-G01-19             | 0.55 | 0.2323 ±    | 0.0595      | 0.00070 ±  | 0.00006     | 0.0225 ±   | 0.0061      | -254          | 4.53 ±                 | 0.42        | 22.6 ±                 | 6.1         |
| LAD02-G01-20             | 0.55 | 0.7488 ±    | 0.0511      | 0.00572 ±  | 0.00026     | 0.5906 ±   | 0.0486      | -1071         | 36.8 ±                 | 1.7         | 471 ±                  | 39          |
| LAD02-G01-21             | 0.70 | 0.2088 ±    | 0.0234      | 0.00084 ±  | 0.00004     | 0.0242 ±   | 0.0029      | -290          | 5.43 ±                 | 0.24        | 24.3 ±                 | 2.9         |
| LAD02-G01-23             | 0.65 | 0.1623 ±    | 0.0437      | 0.00088 ±  | 0.00007     | 0.0197 ±   | 0.0055      | -144          | 5.67 ±                 | 0.43        | 19.8 ±                 | 5.5         |
| LAD02-G01-24             | 0.44 | 0.1128 ±    | 0.0475      | 0.00057 ±  | 0.00005     | 0.0089 ±   | 0.0038      | -31           | 3.69 ±                 | 0.31        | 9.0 ±                  | 3.9         |
| LAD02-G01-25             | 1.03 | 0.0839 ±    | 0.0205      | 0.00065 ±  | 0.00003     | 0.0076 ±   | 0.0019      | -31           | 4.22 ±                 | 0.21        | 7.7 ±                  | 1.9         |
| LAD02-G01-26             | 0.42 | 0.1651 ±    | 0.0985      | 0.00065 ±  | 0.00009     | 0.0148 ±   | 0.0090      | -24           | 4.18 ±                 | 0.57        | 14.9 ±                 | 9.1         |
| LAD02-G01-27             | 0.37 | 0.1995 ±    | 0.0339      | 0.00077 ±  | 0.00005     | 0.0213 ±   | 0.0038      | -246          | 4.99 ±                 | 0.30        | 21.4 ±                 | 3.8         |
| LAD02-G01-28             | 0.64 | 0.0918 ±    | 0.0260      | 0.00073 ±  | 0.00004     | 0.0093 ±   | 0.0027      | -35           | 4.73 ±                 | 0.27        | 9.4 ±                  | 2.7         |
| LAD02-G01-29             | 0.39 | 0.3965 ±    | 0.0600      | 0.00099 ±  | 0.00007     | 0.0542 ±   | 0.0092      | -590          | 6.39 ±                 | 0.48        | 53.6 ±                 | 9.0         |
| LAD02-G01-30             | 0.53 | 0.1102 ±    | 0.0425      | 0.00077 ±  | 0.00006     | 0.0117 ±   | 0.0046      | -36           | 4.97 ±                 | 0.39        | 11.8 ±                 | 4.7         |
| LAD02-G01-31             | 0.57 | 0.0599 ±    | 0.0187      | 0.00068 ±  | 0.00004     | 0.0056 ±   | 0.0018      | conc.         | 4.35 ±                 | 0.24        | 5.6 ±                  | 1.8         |
| LAD02-G01-32             | 0.58 | 0.0867 ±    | 0.0344      | 0.00075 ±  | 0.00006     | 0.0090 ±   | 0.0036      | -4            | 4.86 ±                 | 0.37        | 9.1 ±                  | 3.7         |
| LAD02-G01-33             | 0.63 | 0.0771 ±    | 0.0189      | 0.00066 ±  | 0.00004     | 0.0070 ±   | 0.0018      | -20           | 4.26 ±                 | 0.23        | 7.1 ±                  | 1.8         |
| LAD02-G01-34             | 0.51 | 0.1353 ±    | 0.0474      | 0.00071 ±  | 0.00006     | 0.0133 ±   | 0.0048      | -78           | 4.58 ±                 | 0.41        | 13.4 ±                 | 4.8         |
| LAD02-G01-35             | 0.70 | 0.1617 ±    | 0.0609      | 0.00064 ±  | 0.00007     | 0.0143 ±   | 0.0056      | -102          | 4.12 ±                 | 0.43        | 14.4 ±                 | 5.6         |

**D02-G03 (Granite)**

|              |      |                 |                   |                 |       |             |            |
|--------------|------|-----------------|-------------------|-----------------|-------|-------------|------------|
| LAD02-G03-1  | 0.35 | 0.0977 ± 0.0696 | 0.00075 ± 0.00008 | 0.0101 ± 0.0073 | conc. | 4.83 ± 0.53 | 10.2 ± 7.3 |
| LAD02-G03-2  | 0.42 | 0.0978 ± 0.0814 | 0.00059 ± 0.00007 | 0.0080 ± 0.0067 | conc. | 3.83 ± 0.46 | 8.1 ± 6.8  |
| LAD02-G03-3  | 0.61 | 0.0496 ± 0.0070 | 0.00919 ± 0.00043 | 0.0628 ± 0.0094 | conc. | 59.0 ± 2.8  | 61.8 ± 9.2 |
| LAD02-G03-4  | 0.32 | 0.1349 ± 0.0706 | 0.00071 ± 0.00008 | 0.0133 ± 0.0071 | -25   | 4.60 ± 0.50 | 13.4 ± 7.2 |
| LAD02-G03-5  | 0.39 | 0.0479 ± 0.0832 | 0.00062 ± 0.00008 | 0.0041 ± 0.0072 | conc. | 4.02 ± 0.50 | 4.2 ± 7.3  |
| LAD02-G03-6  | 0.60 | 0.0703 ± 0.0415 | 0.00077 ± 0.00006 | 0.0075 ± 0.0045 | conc. | 4.98 ± 0.38 | 7.6 ± 4.5  |
| LAD02-G03-7  | 0.55 | 0.0589 ± 0.0578 | 0.00052 ± 0.00005 | 0.0042 ± 0.0041 | conc. | 3.33 ± 0.31 | 4.3 ± 4.2  |
| LAD02-G03-8  | 0.98 | 0.0826 ± 0.0392 | 0.00060 ± 0.00004 | 0.0068 ± 0.0033 | conc. | 3.85 ± 0.28 | 6.9 ± 3.3  |
| LAD02-G03-9  | 0.57 | 0.0465 ± 0.0053 | 0.00984 ± 0.00035 | 0.0630 ± 0.0075 | conc. | 63.1 ± 2.3  | 62.1 ± 7.4 |
| LAD02-G03-10 | 0.57 | 0.0745 ± 0.0732 | 0.00065 ± 0.00007 | 0.0067 ± 0.0066 | conc. | 4.2 ± 0.46  | 6.8 ± 6.7  |
| LAD02-G03-11 | 0.46 | 0.0790 ± 0.0568 | 0.00070 ± 0.00007 | 0.0077 ± 0.0056 | conc. | 4.5 ± 0.42  | 7.8 ± 5.6  |
| LAD02-G03-12 | 0.52 | 0.0977 ± 0.0704 | 0.00067 ± 0.00007 | 0.0090 ± 0.0065 | conc. | 4.3 ± 0.45  | 9.1 ± 6.6  |
| LAD02-G03-13 | 0.46 | 0.4790 ± 0.0531 | 0.00117 ± 0.00008 | 0.0774 ± 0.0100 | -767  | 7.6 ± 0.50  | 75.7 ± 9.8 |
| LAD02-G03-14 | 0.52 | 0.1248 ± 0.0756 | 0.00074 ± 0.00007 | 0.0128 ± 0.0079 | conc. | 4.8 ± 0.48  | 12.9 ± 7.9 |
| LAD02-G03-15 | 0.41 | 0.1387 ± 0.0760 | 0.00068 ± 0.00007 | 0.0130 ± 0.0072 | -23   | 4.4 ± 0.44  | 13.1 ± 7.3 |
| LAD02-G03-16 | 0.42 | 0.0923 ± 0.0487 | 0.00061 ± 0.00005 | 0.0077 ± 0.0041 | conc. | 3.9 ± 0.30  | 7.8 ± 4.2  |
| LAD02-G03-17 | 0.52 | 0.0799 ± 0.0449 | 0.00063 ± 0.00005 | 0.0069 ± 0.0039 | conc. | 4.0 ± 0.30  | 7.0 ± 4.0  |
| LAD02-G03-18 | 0.48 | 0.0811 ± 0.0628 | 0.00066 ± 0.00006 | 0.0074 ± 0.0058 | conc. | 4.3 ± 0.39  | 7.5 ± 5.8  |
| LAD02-G03-19 | 0.71 | 0.0511 ± 0.0318 | 0.00070 ± 0.00004 | 0.0049 ± 0.0031 | conc. | 4.5 ± 0.27  | 5.0 ± 3.1  |
| LAD02-G03-20 | 0.63 | 0.1327 ± 0.0663 | 0.00068 ± 0.00006 | 0.0124 ± 0.0063 | -32   | 4.4 ± 0.40  | 12.6 ± 6.4 |
| LAD02-G03-21 | 0.43 | 0.1333 ± 0.0808 | 0.00065 ± 0.00007 | 0.0120 ± 0.0074 | 0     | 4.2 ± 0.44  | 12.1 ± 7.4 |
| LAD02-G03-22 | 0.56 | 0.1148 ± 0.0694 | 0.00069 ± 0.00007 | 0.0109 ± 0.0066 | conc. | 4.4 ± 0.42  | 11.0 ± 6.7 |
| LAD02-G03-23 | 0.56 | 0.2522 ± 0.0773 | 0.00075 ± 0.00007 | 0.0260 ± 0.0084 | -258  | 4.8 ± 0.46  | 26.1 ± 8.4 |
| LAD02-G03-24 | 0.56 | 0.2823 ± 0.0741 | 0.00105 ± 0.00009 | 0.0410 ± 0.0113 | -326  | 6.8 ± 0.59  | 41 ± 11    |
| LAD02-G03-25 | 0.58 | 0.2404 ± 0.0656 | 0.00093 ± 0.00008 | 0.0308 ± 0.0088 | -260  | 6.0 ± 0.49  | 30.8 ± 8.8 |
| LAD02-G03-26 | 0.47 | 0.0860 ± 0.0657 | 0.00063 ± 0.00006 | 0.0074 ± 0.0057 | conc. | 4.0 ± 0.36  | 7.5 ± 5.8  |
| LAD02-G03-27 | 0.76 | 0.2189 ± 0.0333 | 0.00083 ± 0.00004 | 0.0249 ± 0.0040 | -289  | 5.3 ± 0.27  | 25.0 ± 4.0 |
| LAD02-G03-28 | 0.73 | 0.0668 ± 0.0466 | 0.00063 ± 0.00005 | 0.0058 ± 0.0041 | conc. | 4.0 ± 0.29  | 5.8 ± 4.1  |
| LAD02-G03-29 | 0.50 | 0.0740 ± 0.0624 | 0.00063 ± 0.00005 | 0.0064 ± 0.0054 | conc. | 4.1 ± 0.35  | 6.5 ± 5.5  |
| LAD02-G03-30 | 0.48 | 0.0958 ± 0.0670 | 0.00063 ± 0.00006 | 0.0084 ± 0.0059 | conc. | 4.1 ± 0.37  | 8.5 ± 6.0  |

---

**D01-V02 (polymictic volcanic conglomerate)**

|              |      |                 |                   |                 |       |              |             |
|--------------|------|-----------------|-------------------|-----------------|-------|--------------|-------------|
| LAD01-V02-1  | 0.22 | 0.0607 ± 0.0014 | 0.09823 ± 0.00309 | 0.8216 ± 0.0324 | conc. | 604 ± 19     | 609 ± 24    |
| LAD01-V02-2  | 1.24 | 0.0586 ± 0.0027 | 0.09540 ± 0.00313 | 0.7710 ± 0.0432 | conc. | 587 ± 19     | 580 ± 33    |
| LAD01-V02-3  | 0.74 | 0.0538 ± 0.0018 | 0.04507 ± 0.00144 | 0.3344 ± 0.0156 | conc. | 284.2 ± 9.1  | 293 ± 14    |
| LAD01-V02-4  | 0.57 | 0.0521 ± 0.0017 | 0.04445 ± 0.00141 | 0.3194 ± 0.0146 | conc. | 280.4 ± 8.9  | 281 ± 13    |
| LAD01-V02-5  | 1.68 | 0.0611 ± 0.0013 | 0.10227 ± 0.00321 | 0.8617 ± 0.0326 | conc. | 628 ± 20     | 631 ± 24    |
| LAD01-V02-6  | 0.53 | 0.0591 ± 0.0013 | 0.09098 ± 0.00264 | 0.7412 ± 0.0273 | conc. | 561 ± 16     | 563 ± 21    |
| LAD01-V02-7  | 0.59 | 0.0589 ± 0.0013 | 0.08805 ± 0.00255 | 0.7149 ± 0.0261 | conc. | 544 ± 16     | 548 ± 20    |
| LAD01-V02-8  | 0.37 | 0.0726 ± 0.0012 | 0.16791 ± 0.00483 | 1.6806 ± 0.0553 | conc. | 1001 ± 29    | 1001 ± 33   |
| LAD01-V02-9  | 0.35 | 0.0739 ± 0.0013 | 0.12664 ± 0.00365 | 1.2901 ± 0.0434 | -3    | 769 ± 22     | 841 ± 28    |
| LAD01-V02-12 | 0.56 | 0.0649 ± 0.0018 | 0.11820 ± 0.00346 | 1.0576 ± 0.0425 | conc. | 720 ± 21     | 733 ± 29    |
| LAD01-V02-13 | 0.57 | 0.0618 ± 0.0017 | 0.11816 ± 0.00346 | 1.0069 ± 0.0406 | conc. | 720 ± 21     | 707 ± 28    |
| LAD01-V02-14 | 0.79 | 0.0517 ± 0.0023 | 0.04275 ± 0.00129 | 0.3046 ± 0.0162 | conc. | 269.8 ± 8.1  | 270 ± 14    |
| LAD01-V02-15 | 0.28 | 0.0557 ± 0.0044 | 0.04349 ± 0.00144 | 0.3340 ± 0.0288 | conc. | 274.4 ± 9.1  | 293 ± 25    |
| LAD01-V02-16 | 0.51 | 0.0605 ± 0.0253 | 0.00080 ± 0.00005 | 0.0067 ± 0.0028 | conc. | 5.18 ± 0.35  | 6.8 ± 2.9   |
| LAD01-V02-17 | 0.38 | 0.0762 ± 0.0404 | 0.00081 ± 0.00007 | 0.0085 ± 0.0046 | conc. | 5.21 ± 0.47  | 8.6 ± 4.6   |
| LAD01-V02-18 | 0.17 | 0.0564 ± 0.0014 | 0.06686 ± 0.00188 | 0.5202 ± 0.0198 | conc. | 417 ± 12     | 425 ± 16    |
| LAD01-V02-19 | 0.55 | 0.0539 ± 0.0011 | 0.06472 ± 0.00180 | 0.4806 ± 0.0168 | conc. | 404 ± 11     | 398 ± 14    |
| LAD01-V02-20 | 0.77 | 0.0511 ± 0.0018 | 0.04693 ± 0.00134 | 0.3307 ± 0.0152 | conc. | 295.6 ± 8.5  | 290 ± 13    |
| LAD01-V02-21 | 0.93 | 0.0550 ± 0.0019 | 0.04823 ± 0.00138 | 0.3656 ± 0.0166 | conc. | 303.6 ± 8.7  | 316 ± 14    |
| LAD01-V02-22 | 0.67 | 0.0572 ± 0.0198 | 0.00085 ± 0.00006 | 0.0067 ± 0.0024 | conc. | 5.49 ± 0.36  | 6.8 ± 2.4   |
| LAD01-V02-23 | 0.58 | 0.0535 ± 0.0217 | 0.00081 ± 0.00006 | 0.0060 ± 0.0025 | conc. | 5.22 ± 0.37  | 6.1 ± 2.5   |
| LAD01-V02-24 | 0.83 | 0.0567 ± 0.0116 | 0.00081 ± 0.00004 | 0.0064 ± 0.0013 | conc. | 5.24 ± 0.25  | 6.4 ± 1.4   |
| LAD01-V02-25 | 0.43 | 0.0481 ± 0.0188 | 0.00080 ± 0.00005 | 0.0053 ± 0.0021 | conc. | 5.14 ± 0.34  | 5.4 ± 2.1   |
| LAD01-V02-26 | 0.58 | 0.3105 ± 0.0298 | 0.00128 ± 0.00007 | 0.0548 ± 0.0061 | -479  | 8.24 ± 0.45  | 54.1 ± 6.0  |
| LAD01-V02-28 | 0.67 | 0.0628 ± 0.0146 | 0.00087 ± 0.00005 | 0.0075 ± 0.0018 | conc. | 5.58 ± 0.30  | 7.6 ± 1.8   |
| LAD01-V02-29 | 0.72 | 0.0524 ± 0.0013 | 0.04368 ± 0.00098 | 0.3155 ± 0.0104 | conc. | 275.6 ± 6.2  | 278.4 ± 9.2 |
| LAD01-V02-30 | 0.44 | 0.0562 ± 0.0015 | 0.04464 ± 0.00101 | 0.3459 ± 0.0123 | -1    | 281.5 ± 6.4  | 302 ± 11    |
| LAD01-V02-31 | 0.50 | 0.0805 ± 0.0242 | 0.00152 ± 0.00008 | 0.0169 ± 0.0051 | -16   | 9.79 ± 0.49  | 17.0 ± 5.2  |
| LAD01-V02-32 | 0.49 | 0.1115 ± 0.0332 | 0.00139 ± 0.00008 | 0.0213 ± 0.0065 | -61   | 8.93 ± 0.52  | 21.4 ± 6.5  |
| LAD01-V02-33 | 0.08 | 0.0572 ± 0.0012 | 0.08518 ± 0.00191 | 0.6713 ± 0.0204 | conc. | 527 ± 12     | 521 ± 16    |
| LAD01-V02-34 | 0.13 | 0.0644 ± 0.0012 | 0.11194 ± 0.00251 | 0.9934 ± 0.0294 | conc. | 684 ± 15     | 700 ± 21    |
| LAD01-V02-35 | 0.56 | 0.0692 ± 0.0345 | 0.00084 ± 0.00005 | 0.0080 ± 0.0040 | conc. | 5.39 ± 0.33  | 8.1 ± 4.0   |
| LAD01-V02-36 | 0.61 | 0.0504 ± 0.0184 | 0.00079 ± 0.00004 | 0.0055 ± 0.0020 | conc. | 5.11 ± 0.23  | 5.6 ± 2.0   |
| LAD01-V02-37 | 0.37 | 0.0673 ± 0.0403 | 0.00078 ± 0.00006 | 0.0072 ± 0.0043 | conc. | 5.01 ± 0.37  | 7.3 ± 4.4   |
| LAD01-V02-38 | 0.79 | 0.0634 ± 0.0261 | 0.00083 ± 0.00005 | 0.0073 ± 0.0030 | conc. | 5.36 ± 0.31  | 7.4 ± 3.1   |
| LAD01-V02-39 | 0.87 | 0.0535 ± 0.0024 | 0.04109 ± 0.00113 | 0.3031 ± 0.0161 | conc. | 259.6 ± 7.1  | 269 ± 14    |
| LAD01-V02-40 | 1.15 | 0.0524 ± 0.0126 | 0.00260 ± 0.00011 | 0.0188 ± 0.0046 | conc. | 16.77 ± 0.71 | 18.9 ± 4.6  |
| LAD01-V02-41 | 1.23 | 0.0521 ± 0.0123 | 0.00256 ± 0.00011 | 0.0184 ± 0.0044 | conc. | 16.49 ± 0.70 | 18.5 ± 4.5  |
| LAD01-V02-42 | 0.46 | 0.0509 ± 0.0159 | 0.00155 ± 0.00007 | 0.0109 ± 0.0034 | conc. | 9.96 ± 0.47  | 11.0 ± 3.5  |
| LAD01-V02-43 | 0.43 | 0.0547 ± 0.0209 | 0.00217 ± 0.00012 | 0.0164 ± 0.0063 | conc. | 13.99 ± 0.74 | 16.5 ± 6.4  |
| LAD01-V02-44 | 0.70 | 0.0452 ± 0.0051 | 0.01972 ± 0.00063 | 0.1228 ± 0.0144 | conc. | 125.9 ± 4.0  | 118 ± 14    |
| LAD01-V02-45 | 0.78 | 0.0605 ± 0.0452 | 0.00065 ± 0.00005 | 0.0054 ± 0.0041 | conc. | 4.19 ± 0.33  | 5.5 ± 4.1   |
| LAD01-V02-46 | 0.43 | 0.0281 ± 0.0304 | 0.00082 ± 0.00005 | 0.0032 ± 0.0034 | conc. | 5.28 ± 0.34  | 3.2 ± 3.5   |
| LAD01-V02-47 | 1.05 | 0.0545 ± 0.0209 | 0.00079 ± 0.00004 | 0.0059 ± 0.0023 | conc. | 5.10 ± 0.27  | 6.0 ± 2.3   |
| LAD01-V02-48 | 0.97 | 0.0421 ± 0.0113 | 0.01339 ± 0.00057 | 0.0777 ± 0.0211 | conc. | 85.7 ± 3.6   | 76 ± 21     |
| LAD01-V02-49 | 0.80 | 0.0497 ± 0.0288 | 0.00077 ± 0.00005 | 0.0053 ± 0.0031 | conc. | 4.95 ± 0.30  | 5.3 ± 3.1   |
| LAD01-V02-50 | 0.67 | 0.1972 ± 0.0398 | 0.00098 ± 0.00006 | 0.0267 ± 0.0057 | -227  | 6.32 ± 0.41  | 26.7 ± 5.7  |
| LAD01-V02-52 | 0.27 | 0.0573 ± 0.0018 | 0.08329 ± 0.00241 | 0.6583 ± 0.0281 | conc. | 516 ± 15     | 514 ± 22    |
| LAD01-V02-53 | 1.01 | 0.0750 ± 0.0037 | 0.03981 ± 0.00122 | 0.4117 ± 0.0241 | -28   | 251.6 ± 7.7  | 350 ± 21    |
| LAD01-V02-54 | 0.45 | 0.0580 ± 0.0014 | 0.07516 ± 0.00214 | 0.6008 ± 0.0223 | conc. | 467 ± 13     | 478 ± 18    |
| LAD01-V02-55 | 0.01 | 0.0519 ± 0.0028 | 0.04182 ± 0.00126 | 0.2993 ± 0.0184 | conc. | 264.1 ± 8.0  | 266 ± 16    |
| LAD01-V02-56 | 0.86 | 0.0496 ± 0.0019 | 0.02249 ± 0.00065 | 0.1537 ± 0.0074 | conc. | 143.4 ± 4.2  | 145.2 ± 6.9 |
| LAD01-V02-57 | 0.44 | 0.0724 ± 0.0016 | 0.16485 ± 0.00471 | 1.6464 ± 0.0594 | conc. | 984 ± 28     | 988 ± 36    |

**D01-V25 (dacite clast in volcanoclastic rocks)**

|              |      |                 |                   |                 |       |              |             |
|--------------|------|-----------------|-------------------|-----------------|-------|--------------|-------------|
| LAD01-V25-2  | 0.76 | 0.0473 ± 0.0079 | 0.01955 ± 0.00079 | 0.1274 ± 0.0219 | conc. | 124.8 ± 5.0  | 122 ± 21    |
| LAD01-V25-3  | 0.53 | 0.4699 ± 0.0451 | 0.00148 ± 0.00009 | 0.0956 ± 0.0107 | -760  | 9.50 ± 0.55  | 93 ± 10     |
| LAD01-V25-4  | 0.70 | 0.0537 ± 0.0013 | 0.05706 ± 0.00194 | 0.4223 ± 0.0177 | conc. | 358 ± 12     | 358 ± 15    |
| LAD01-V25-5  | 0.49 | 0.0584 ± 0.0016 | 0.08731 ± 0.00298 | 0.7033 ± 0.0304 | conc. | 540 ± 18     | 541 ± 23    |
| LAD01-V25-6  | 0.24 | 0.0499 ± 0.0013 | 0.02282 ± 0.00078 | 0.1569 ± 0.0068 | conc. | 145.5 ± 5.0  | 148.0 ± 6.4 |
| LAD01-V25-7  | 2.16 | 0.0505 ± 0.0044 | 0.01483 ± 0.00054 | 0.1032 ± 0.0097 | conc. | 94.9 ± 3.5   | 99.7 ± 9.4  |
| LAD01-V25-8  | 1.18 | 0.0495 ± 0.0019 | 0.01613 ± 0.00056 | 0.1101 ± 0.0056 | conc. | 103.2 ± 3.6  | 106.1 ± 5.4 |
| LAD01-V25-11 | 0.47 | 0.0546 ± 0.0013 | 0.06399 ± 0.00194 | 0.4821 ± 0.0184 | conc. | 400 ± 12     | 399 ± 15    |
| LAD01-V25-12 | 1.04 | 0.0624 ± 0.0034 | 0.01557 ± 0.00050 | 0.1340 ± 0.0085 | -17   | 99.6 ± 3.2   | 127.7 ± 8.1 |
| LAD01-V25-13 | 0.23 | 0.0619 ± 0.0015 | 0.09582 ± 0.00292 | 0.8175 ± 0.0315 | conc. | 590 ± 18     | 607 ± 23    |
| LAD01-V25-14 | 0.91 | 0.0736 ± 0.0107 | 0.00322 ± 0.00013 | 0.0327 ± 0.0049 | -30   | 20.71 ± 0.86 | 32.6 ± 4.9  |
| LAD01-V25-16 | 0.54 | 0.0560 ± 0.0015 | 0.08775 ± 0.00268 | 0.6775 ± 0.0272 | conc. | 542 ± 17     | 525 ± 21    |
| LAD01-V25-17 | 0.44 | 0.0590 ± 0.0022 | 0.08397 ± 0.00261 | 0.6833 ± 0.0328 | conc. | 520 ± 16     | 529 ± 25    |
| LAD01-V25-18 | 0.43 | 0.0907 ± 0.0017 | 0.22167 ± 0.00673 | 2.7715 ± 0.0996 | conc. | 1291 ± 39    | 1348 ± 48   |
| LAD01-V25-19 | 0.42 | 0.0475 ± 0.1138 | 0.00084 ± 0.00013 | 0.0055 ± 0.0131 | conc. | 5.39 ± 0.85  | 6 ± 13      |
| LAD01-V25-20 | 0.78 | 0.0481 ± 0.0017 | 0.01743 ± 0.00032 | 0.1156 ± 0.0046 | conc. | 111.4 ± 2.0  | 111.1 ± 4.4 |
| LAD01-V25-21 | 0.51 | 0.0481 ± 0.1151 | 0.00079 ± 0.00013 | 0.0052 ± 0.0125 | conc. | 5.07 ± 0.81  | 5 ± 13      |
| LAD01-V25-22 | 0.92 | 0.0880 ± 0.0477 | 0.00080 ± 0.00006 | 0.0097 ± 0.0053 | conc. | 5.17 ± 0.41  | 9.8 ± 5.4   |
| LAD01-V25-23 | 1.71 | 0.0842 ± 0.0060 | 0.00393 ± 0.00009 | 0.0456 ± 0.0034 | -63   | 25.26 ± 0.59 | 45.2 ± 3.4  |
| LAD01-V25-24 | 0.54 | 0.0526 ± 0.0550 | 0.00276 ± 0.00025 | 0.0200 ± 0.0210 | conc. | 17.8 ± 1.6   | 20 ± 21     |
| LAD01-V25-25 | 0.69 | 0.2733 ± 0.0620 | 0.00100 ± 0.00009 | 0.0377 ± 0.0091 | -333  | 6.45 ± 0.55  | 37.6 ± 9.1  |
| LAD01-V25-26 | 1.02 | 0.0703 ± 0.0434 | 0.00082 ± 0.00006 | 0.0079 ± 0.0049 | conc. | 5.28 ± 0.39  | 8.0 ± 5.0   |
| LAD01-V25-27 | 0.75 | 0.0665 ± 0.0464 | 0.00080 ± 0.00006 | 0.0073 ± 0.0051 | conc. | 5.15 ± 0.40  | 7.4 ± 5.2   |
| LAD01-V25-28 | 0.63 | 0.0537 ± 0.0038 | 0.02099 ± 0.00053 | 0.1555 ± 0.0117 | conc. | 133.9 ± 3.4  | 147 ± 11    |
| LAD01-V25-29 | 1.66 | 0.0592 ± 0.0107 | 0.00262 ± 0.00009 | 0.0214 ± 0.0039 | -1    | 16.86 ± 0.58 | 21.5 ± 3.9  |
| LAD01-V25-30 | 0.92 | 0.0489 ± 0.0016 | 0.01614 ± 0.00036 | 0.1088 ± 0.0044 | conc. | 103.2 ± 2.3  | 104.9 ± 4.2 |
| LAD01-V25-31 | 0.58 | 0.3350 ± 0.0390 | 0.00124 ± 0.00007 | 0.0571 ± 0.0074 | -511  | 7.97 ± 0.45  | 56.4 ± 7.3  |
| LAD01-V25-32 | 0.71 | 0.0750 ± 0.0421 | 0.00086 ± 0.00006 | 0.0089 ± 0.0050 | conc. | 5.52 ± 0.40  | 9.0 ± 5.1   |
| LAD01-V25-33 | 0.75 | 0.0577 ± 0.0171 | 0.00295 ± 0.00013 | 0.0235 ± 0.0070 | conc. | 18.97 ± 0.82 | 23.5 ± 7.0  |
| LAD01-V25-34 | 0.87 | 0.0478 ± 0.0098 | 0.01588 ± 0.00054 | 0.1046 ± 0.0217 | conc. | 101.5 ± 3.5  | 101 ± 21    |
| LAD01-V25-35 | 0.92 | 0.0979 ± 0.0820 | 0.00220 ± 0.00026 | 0.0297 ± 0.0251 | conc. | 14.1 ± 1.7   | 30 ± 25     |
| LAD01-V25-36 | 0.43 | 0.0481 ± 0.0020 | 0.02281 ± 0.00052 | 0.1513 ± 0.0071 | conc. | 145.4 ± 3.3  | 143.1 ± 6.7 |
| LAD01-V25-37 | 1.03 | 0.0512 ± 0.0016 | 0.04416 ± 0.00098 | 0.3119 ± 0.0121 | conc. | 278.5 ± 6.2  | 276 ± 11    |

**D01-S17 (fine sandstone)**

|              |      |                 |                   |                 |       |              |            |
|--------------|------|-----------------|-------------------|-----------------|-------|--------------|------------|
| LAD01-S17-1  | 0.57 | 0.0258 ± 0.0461 | 0.00061 ± 0.00006 | 0.0022 ± 0.0039 | conc. | 3.90 ± 0.42  | 2.2 ± 3.9  |
| LAD01-S17-2  | 0.62 | 0.0974 ± 0.0369 | 0.00074 ± 0.00006 | 0.0099 ± 0.0038 | -20   | 4.74 ± 0.40  | 10.0 ± 3.9 |
| LAD01-S17-3  | 0.26 | 0.0785 ± 0.0024 | 0.04182 ± 0.00075 | 0.4526 ± 0.0160 | -37   | 264.1 ± 4.7  | 379 ± 13   |
| LAD01-S17-4  | 0.44 | 0.0848 ± 0.0014 | 0.17470 ± 0.00290 | 2.0424 ± 0.0474 | -5    | 1038 ± 17    | 1130 ± 26  |
| LAD01-S17-5  | 0.75 | 0.0773 ± 0.0291 | 0.00069 ± 0.00005 | 0.0073 ± 0.0028 | conc. | 4.42 ± 0.32  | 7.4 ± 2.8  |
| LAD01-S17-6  | 1.14 | 0.0564 ± 0.0131 | 0.00102 ± 0.00004 | 0.0080 ± 0.0019 | conc. | 6.59 ± 0.29  | 8.0 ± 1.9  |
| LAD01-S17-7  | 0.39 | 0.0875 ± 0.0197 | 0.00071 ± 0.00004 | 0.0086 ± 0.0020 | -40   | 4.59 ± 0.25  | 8.7 ± 2.0  |
| LAD01-S17-8  | 0.95 | 0.0739 ± 0.0159 | 0.00077 ± 0.00004 | 0.0078 ± 0.0017 | -20   | 4.94 ± 0.24  | 7.9 ± 1.7  |
| LAD01-S17-9  | 1.01 | 0.0731 ± 0.0011 | 0.15047 ± 0.00247 | 1.5163 ± 0.0338 | conc. | 904 ± 15     | 937 ± 21   |
| LAD01-S17-11 | 1.10 | 0.3834 ± 0.0322 | 0.00119 ± 0.00006 | 0.0631 ± 0.0061 | -625  | 7.69 ± 0.37  | 62.2 ± 6.0 |
| LAD01-S17-12 | 0.71 | 0.1827 ± 0.0366 | 0.00067 ± 0.00004 | 0.0168 ± 0.0035 | -204  | 4.31 ± 0.27  | 17.0 ± 3.6 |
| LAD01-S17-14 | 1.02 | 0.3230 ± 0.0219 | 0.00094 ± 0.00004 | 0.0417 ± 0.0032 | -531  | 6.03 ± 0.23  | 41.5 ± 3.2 |
| LAD01-S17-15 | 0.40 | 0.0906 ± 0.0371 | 0.00070 ± 0.00005 | 0.0088 ± 0.0037 | -8    | 4.54 ± 0.32  | 8.9 ± 3.7  |
| LAD01-S17-16 | 0.93 | 0.2138 ± 0.0271 | 0.00077 ± 0.00004 | 0.0227 ± 0.0031 | -292  | 4.97 ± 0.25  | 22.8 ± 3.1 |
| LAD01-S17-17 | 0.65 | 0.0526 ± 0.0016 | 0.04358 ± 0.00091 | 0.3159 ± 0.0115 | conc. | 275.0 ± 5.7  | 279 ± 10   |
| LAD01-S17-18 | 0.95 | 0.0773 ± 0.0216 | 0.00064 ± 0.00003 | 0.0069 ± 0.0020 | -14   | 4.14 ± 0.21  | 6.9 ± 2.0  |
| LAD01-S17-19 | 0.25 | 0.0594 ± 0.0014 | 0.04864 ± 0.00100 | 0.3984 ± 0.0125 | -6    | 306.1 ± 6.3  | 340 ± 11   |
| LAD01-S17-20 | 0.96 | 0.0588 ± 0.0009 | 0.07549 ± 0.00152 | 0.6117 ± 0.0156 | conc. | 469.1 ± 9.5  | 485 ± 12   |
| LAD01-S17-21 | 0.63 | 0.0476 ± 0.0053 | 0.00449 ± 0.00013 | 0.0294 ± 0.0034 | conc. | 28.88 ± 0.81 | 29.5 ± 3.4 |
| LAD01-S17-22 | 0.46 | 0.0549 ± 0.0053 | 0.00417 ± 0.00011 | 0.0316 ± 0.0031 | -3    | 26.82 ± 0.73 | 31.6 ± 3.1 |
| LAD01-S17-23 | 0.41 | 0.0797 ± 0.0293 | 0.00087 ± 0.00005 | 0.0095 ± 0.0035 | -3    | 5.59 ± 0.30  | 9.6 ± 3.6  |
| LAD01-S17-24 | 0.86 | 0.0330 ± 0.0347 | 0.00068 ± 0.00004 | 0.0031 ± 0.0032 | conc. | 4.35 ± 0.26  | 3.1 ± 3.3  |
| LAD01-S17-25 | 0.52 | 0.1010 ± 0.0488 | 0.00068 ± 0.00005 | 0.0094 ± 0.0046 | -5    | 4.35 ± 0.31  | 9.5 ± 4.6  |
| LAD01-S17-26 | 0.39 | 0.0585 ± 0.0060 | 0.00584 ± 0.00015 | 0.0471 ± 0.0050 | -9    | 37.5 ± 1.0   | 46.8 ± 5.0 |
| LAD01-S17-27 | 0.29 | 0.0593 ± 0.0014 | 0.08373 ± 0.00155 | 0.6846 ± 0.0205 | conc. | 518.3 ± 9.6  | 530 ± 16   |
| LAD01-S17-28 | 1.01 | 0.0552 ± 0.0022 | 0.03460 ± 0.00068 | 0.2631 ± 0.0118 | -1    | 219.2 ± 4.3  | 237 ± 11   |
| LAD01-S17-29 | 0.54 | 0.0589 ± 0.0010 | 0.07826 ± 0.00142 | 0.6354 ± 0.0161 | conc. | 485.8 ± 8.8  | 499 ± 13   |

---

**D06-S07 (sedimentary rock: laminated silt~mudstone, distal turbidite)**

|             |      |                 |                   |                 |       |              |             |
|-------------|------|-----------------|-------------------|-----------------|-------|--------------|-------------|
| LAD06S07-1  | 0.61 | 0.0492 ± 0.0017 | 0.01059 ± 0.00029 | 0.0718 ± 0.0031 | conc. | 67.9 ± 1.8   | 70.4 ± 3.1  |
| LAD06S07-2  | 0.12 | 0.0445 ± 0.0029 | 0.01579 ± 0.00045 | 0.0969 ± 0.0070 | conc. | 101.0 ± 2.9  | 93.9 ± 6.8  |
| LAD06S07-3  | 1.01 | 0.0476 ± 0.0013 | 0.01514 ± 0.00041 | 0.0995 ± 0.0038 | conc. | 96.9 ± 2.6   | 96.3 ± 3.7  |
| LAD06S07-4  | 1.55 | 0.1186 ± 0.0200 | 0.00095 ± 0.00004 | 0.0155 ± 0.0027 | -107  | 6.11 ± 0.27  | 15.6 ± 2.7  |
| LAD06S07-5  | 0.83 | 0.1621 ± 0.0704 | 0.00062 ± 0.00006 | 0.0138 ± 0.0061 | -84   | 3.98 ± 0.40  | 13.9 ± 6.2  |
| LAD06S07-6  | 0.71 | 0.0512 ± 0.0019 | 0.01485 ± 0.00041 | 0.1049 ± 0.0049 | conc. | 95.0 ± 2.6   | 101.3 ± 4.7 |
| LAD06S07-7  | 0.39 | 0.0483 ± 0.0025 | 0.01091 ± 0.00031 | 0.0727 ± 0.0043 | conc. | 70.0 ± 2.0   | 71.2 ± 4.2  |
| LAD06S07-8  | 0.62 | 0.0568 ± 0.0010 | 0.07666 ± 0.00205 | 0.6003 ± 0.0191 | conc. | 476 ± 13     | 477 ± 15    |
| LAD06S07-9  | 0.62 | 0.0546 ± 0.0034 | 0.01666 ± 0.00048 | 0.1254 ± 0.0086 | -2    | 106.5 ± 3.1  | 120.0 ± 8.2 |
| LAD06S07-10 | 0.29 | 0.0673 ± 0.0009 | 0.12356 ± 0.00317 | 1.1462 ± 0.0335 | conc. | 751 ± 19     | 775 ± 23    |
| LAD06S07-11 | 0.33 | 0.0575 ± 0.0030 | 0.02062 ± 0.00056 | 0.1634 ± 0.0097 | -7    | 131.6 ± 3.6  | 153.7 ± 9.1 |
| LAD06S07-12 | 1.01 | 0.0437 ± 0.0422 | 0.00192 ± 0.00013 | 0.0116 ± 0.0112 | conc. | 12.35 ± 0.84 | 12 ± 11     |
| LAD06S07-13 | 0.53 | 0.0479 ± 0.0060 | 0.01445 ± 0.00044 | 0.0954 ± 0.0123 | conc. | 92.5 ± 2.8   | 93 ± 12     |
| LAD06S07-14 | 0.74 | 0.0537 ± 0.0038 | 0.01829 ± 0.00051 | 0.1354 ± 0.0102 | conc. | 116.8 ± 3.3  | 128.9 ± 9.7 |
| LAD06S07-15 | 0.70 | 0.0687 ± 0.0523 | 0.00174 ± 0.00014 | 0.0164 ± 0.0126 | conc. | 11.18 ± 0.88 | 17 ± 13     |
| LAD06S07-16 | 0.47 | 0.0482 ± 0.0074 | 0.02062 ± 0.00066 | 0.1371 ± 0.0215 | conc. | 131.6 ± 4.2  | 130 ± 21    |
| LAD06S07-17 | 0.62 | 0.0488 ± 0.0057 | 0.01156 ± 0.00035 | 0.0778 ± 0.0094 | conc. | 74.1 ± 2.2   | 76.0 ± 9.2  |
| LAD06S07-18 | 0.37 | 0.0458 ± 0.0199 | 0.01186 ± 0.00053 | 0.0749 ± 0.0326 | conc. | 76.0 ± 3.4   | 73 ± 32     |
| LAD06S07-19 | 1.05 | 0.0523 ± 0.0073 | 0.01066 ± 0.00034 | 0.0768 ± 0.0110 | conc. | 68.3 ± 2.2   | 75 ± 11     |
| LAD06S07-20 | 0.89 | 0.0667 ± 0.0042 | 0.01570 ± 0.00037 | 0.1444 ± 0.0098 | -25   | 100.4 ± 2.4  | 136.9 ± 9.3 |
| LAD06S07-21 | 0.36 | 0.0516 ± 0.0207 | 0.00297 ± 0.00012 | 0.0211 ± 0.0085 | conc. | 19.11 ± 0.79 | 21.2 ± 8.5  |
| LAD06S07-22 | 0.88 | 0.0494 ± 0.0023 | 0.01485 ± 0.00033 | 0.1012 ± 0.0053 | conc. | 95.0 ± 2.1   | 97.9 ± 5.1  |
| LAD06S07-23 | 1.64 | 0.0533 ± 0.0019 | 0.05717 ± 0.00123 | 0.4203 ± 0.0173 | conc. | 358.4 ± 7.7  | 356 ± 15    |
| LAD06S07-24 | 0.47 | 0.0486 ± 0.0049 | 0.01133 ± 0.00028 | 0.0759 ± 0.0078 | conc. | 72.7 ± 1.8   | 74.3 ± 7.7  |
| LAD06S07-25 | 1.07 | 0.0479 ± 0.0040 | 0.01505 ± 0.00036 | 0.0994 ± 0.0087 | conc. | 96.3 ± 2.3   | 96.2 ± 8.4  |
| LAD06S07-26 | 1.09 | 0.0495 ± 0.0028 | 0.01650 ± 0.00037 | 0.1126 ± 0.0068 | conc. | 105.5 ± 2.4  | 108.3 ± 6.5 |
| LAD06S07-27 | 0.55 | 0.0583 ± 0.0038 | 0.01076 ± 0.00025 | 0.0865 ± 0.0060 | -11   | 69.0 ± 1.6   | 84.2 ± 5.8  |
| LAD06S07-28 | 0.84 | 0.0503 ± 0.0016 | 0.01929 ± 0.00041 | 0.1337 ± 0.0050 | conc. | 123.2 ± 2.6  | 127.4 ± 4.8 |
| LAD06S07-29 | 1.25 | 0.0704 ± 0.0054 | 0.03705 ± 0.00093 | 0.3599 ± 0.0290 | -20   | 234.5 ± 5.9  | 312 ± 25    |
| LAD06S07-30 | 0.65 | 0.0532 ± 0.0035 | 0.01028 ± 0.00015 | 0.0754 ± 0.0051 | -3    | 65.9 ± 1.0   | 73.8 ± 5.0  |
| LAD06S07-31 | 0.52 | 0.0494 ± 0.0037 | 0.01061 ± 0.00016 | 0.0723 ± 0.0055 | conc. | 68.0 ± 1.1   | 70.9 ± 5.4  |
| LAD06S07-32 | 0.54 | 0.0914 ± 0.0127 | 0.00092 ± 0.00003 | 0.0116 ± 0.0017 | -66   | 5.95 ± 0.18  | 11.8 ± 1.7  |
| LAD06S07-33 | 0.60 | 0.0697 ± 0.0188 | 0.00277 ± 0.00012 | 0.0266 ± 0.0073 | -4    | 17.81 ± 0.75 | 26.6 ± 7.3  |
| LAD06S07-34 | 0.73 | 0.0502 ± 0.0015 | 0.01657 ± 0.00016 | 0.1147 ± 0.0035 | conc. | 106.0 ± 1.0  | 110.3 ± 3.4 |
| LAD06S07-35 | 0.65 | 0.0513 ± 0.0150 | 0.00233 ± 0.00009 | 0.0165 ± 0.0049 | conc. | 15.02 ± 0.55 | 16.6 ± 4.9  |
| LAD06S07-36 | 0.70 | 0.0560 ± 0.0043 | 0.01155 ± 0.00019 | 0.0892 ± 0.0069 | -6    | 74.1 ± 1.2   | 86.7 ± 6.7  |
| LAD06S07-37 | 0.59 | 0.0495 ± 0.0029 | 0.01211 ± 0.00017 | 0.0826 ± 0.0050 | conc. | 77.6 ± 1.1   | 80.6 ± 4.9  |
| LAD06S07-38 | 0.24 | 0.1141 ± 0.0013 | 0.09445 ± 0.00080 | 1.4865 ± 0.0216 | -56   | 581.8 ± 5.0  | 925 ± 13    |
| LAD06S07-39 | 0.61 | 0.0467 ± 0.0013 | 0.01478 ± 0.00026 | 0.0952 ± 0.0032 | conc. | 94.6 ± 1.6   | 92.3 ± 3.1  |
| LAD06S07-40 | 0.71 | 0.0520 ± 0.0042 | 0.01162 ± 0.00026 | 0.0833 ± 0.0070 | conc. | 74.5 ± 1.7   | 81.3 ± 6.8  |
| LAD06S07-41 | 1.17 | 0.0451 ± 0.0033 | 0.01665 ± 0.00035 | 0.1035 ± 0.0078 | conc. | 106.4 ± 2.2  | 100.0 ± 7.5 |
| LAD06S07-42 | 1.24 | 0.0544 ± 0.0045 | 0.01834 ± 0.00042 | 0.1375 ± 0.0117 | conc. | 117.1 ± 2.7  | 131 ± 11    |
| LAD06S07-43 | 0.74 | 0.0706 ± 0.0038 | 0.00807 ± 0.00017 | 0.0786 ± 0.0046 | -38   | 51.8 ± 1.1   | 76.8 ± 4.5  |
| LAD06S07-44 | 0.51 | 0.0481 ± 0.0017 | 0.01864 ± 0.00033 | 0.1237 ± 0.0049 | conc. | 119.1 ± 2.1  | 118.4 ± 4.7 |
| LAD06S07-45 | 0.64 | 0.0541 ± 0.0040 | 0.01152 ± 0.00025 | 0.0859 ± 0.0066 | -2    | 73.9 ± 1.6   | 83.7 ± 6.4  |
| LAD06S07-46 | 0.42 | 0.0906 ± 0.0009 | 0.24005 ± 0.00395 | 2.9995 ± 0.0572 | conc. | 1387 ± 23    | 1407 ± 27   |
| LAD06S07-47 | 0.89 | 0.0594 ± 0.0071 | 0.00180 ± 0.00005 | 0.0147 ± 0.0018 | -10   | 11.56 ± 0.32 | 14.8 ± 1.8  |
| LAD06S07-48 | 0.50 | 0.0472 ± 0.0013 | 0.01671 ± 0.00034 | 0.1088 ± 0.0037 | conc. | 106.8 ± 2.2  | 104.8 ± 3.5 |
| LAD06S07-49 | 1.45 | 0.0484 ± 0.0021 | 0.01676 ± 0.00036 | 0.1119 ± 0.0054 | conc. | 107.2 ± 2.3  | 107.7 ± 5.2 |
| LAD06S07-50 | 0.55 | 0.0490 ± 0.0028 | 0.01703 ± 0.00039 | 0.1150 ± 0.0070 | conc. | 108.8 ± 2.5  | 110.5 ± 6.8 |

**D06-S20 (medium-consolidated siltstone with vein structures & micro-faults)**

|             |      |                 |                   |                 |       |              |             |
|-------------|------|-----------------|-------------------|-----------------|-------|--------------|-------------|
| LAD06S20-1  | 0.78 | 0.0473 ± 0.0071 | 0.00235 ± 0.00007 | 0.0153 ± 0.0024 | conc. | 15.11 ± 0.47 | 15.4 ± 2.4  |
| LAD06S20-2  | 0.73 | 0.0645 ± 0.0111 | 0.00266 ± 0.00010 | 0.0236 ± 0.0042 | -11   | 17.10 ± 0.64 | 23.7 ± 4.2  |
| LAD06S20-3  | 2.25 | 0.5851 ± 0.0155 | 0.00180 ± 0.00005 | 0.1452 ± 0.0053 | -1041 | 11.59 ± 0.29 | 137.7 ± 5.1 |
| LAD06S20-4  | 0.82 | 0.0490 ± 0.0019 | 0.01683 ± 0.00036 | 0.1138 ± 0.0050 | conc. | 107.6 ± 2.3  | 109.4 ± 4.8 |
| LAD06S20-5  | 0.68 | 0.0537 ± 0.0138 | 0.00088 ± 0.00004 | 0.0065 ± 0.0017 | conc. | 5.69 ± 0.24  | 6.6 ± 1.7   |
| LAD06S20-6  | 0.67 | 0.0664 ± 0.0062 | 0.00286 ± 0.00008 | 0.0262 ± 0.0026 | -26   | 18.40 ± 0.52 | 26.2 ± 2.6  |
| LAD06S20-7  | 0.42 | 0.0925 ± 0.0995 | 0.00083 ± 0.00009 | 0.0106 ± 0.0115 | conc. | 5.35 ± 0.58  | 11 ± 12     |
| LAD06S20-8  | 1.22 | 0.0489 ± 0.0021 | 0.01673 ± 0.00035 | 0.1127 ± 0.0054 | conc. | 106.9 ± 2.3  | 108.5 ± 5.2 |
| LAD06S20-9  | 0.69 | 0.4680 ± 0.0424 | 0.00084 ± 0.00004 | 0.0541 ± 0.0056 | -784  | 5.40 ± 0.26  | 53.5 ± 5.5  |
| LAD06S20-10 | 1.16 | 0.2548 ± 0.0683 | 0.00043 ± 0.00003 | 0.0153 ± 0.0043 | -288  | 2.80 ± 0.22  | 15.4 ± 4.3  |
| LAD06S20-11 | 0.66 | 0.0490 ± 0.0024 | 0.01814 ± 0.00039 | 0.1224 ± 0.0067 | conc. | 115.9 ± 2.5  | 117.3 ± 6.4 |
| LAD06S20-12 | 0.17 | 0.0537 ± 0.0016 | 0.05728 ± 0.00117 | 0.4243 ± 0.0156 | conc. | 359.1 ± 7.4  | 359 ± 13    |
| LAD06S20-13 | 1.52 | 0.0465 ± 0.0025 | 0.01521 ± 0.00033 | 0.0975 ± 0.0056 | conc. | 97.3 ± 2.1   | 94.4 ± 5.5  |
| LAD06S20-14 | 0.91 | 0.0512 ± 0.0105 | 0.00238 ± 0.00007 | 0.0168 ± 0.0035 | conc. | 15.32 ± 0.47 | 16.9 ± 3.5  |
| LAD06S20-15 | 0.90 | 0.4855 ± 0.0247 | 0.00239 ± 0.00008 | 0.1602 ± 0.0097 | -817  | 15.41 ± 0.50 | 150.9 ± 9.1 |
| LAD06S20-16 | 0.89 | 0.0916 ± 0.0140 | 0.00071 ± 0.00003 | 0.0090 ± 0.0014 | -62   | 4.60 ± 0.20  | 9.1 ± 1.5   |
| LAD06S20-17 | 1.68 | 0.0496 ± 0.0015 | 0.01401 ± 0.00038 | 0.0959 ± 0.0039 | conc. | 89.7 ± 2.4   | 92.9 ± 3.8  |
| LAD06S20-18 | 0.30 | 0.0549 ± 0.0011 | 0.06293 ± 0.00167 | 0.4763 ± 0.0161 | conc. | 393 ± 10     | 396 ± 13    |
| LAD06S20-19 | 0.45 | 0.0494 ± 0.0015 | 0.01582 ± 0.00043 | 0.1078 ± 0.0043 | conc. | 101.2 ± 2.7  | 104.0 ± 4.2 |
| LAD06S20-20 | 0.78 | 0.0646 ± 0.0012 | 0.11060 ± 0.00293 | 0.9844 ± 0.0322 | conc. | 676 ± 18     | 696 ± 23    |
| LAD06S20-21 | 0.63 | 0.0633 ± 0.0015 | 0.11887 ± 0.00318 | 1.0374 ± 0.0373 | conc. | 724 ± 19     | 723 ± 26    |
| LAD06S20-22 | 0.55 | 0.0540 ± 0.0029 | 0.02084 ± 0.00060 | 0.1553 ± 0.0095 | -1    | 133.0 ± 3.8  | 146.5 ± 9.0 |
| LAD06S20-23 | 0.07 | 0.0530 ± 0.0010 | 0.05548 ± 0.00147 | 0.4054 ± 0.0134 | conc. | 348.1 ± 9.2  | 346 ± 11    |
| LAD06S20-24 | 0.21 | 0.0524 ± 0.0170 | 0.00248 ± 0.00016 | 0.0179 ± 0.0059 | conc. | 15.9 ± 1.0   | 18.0 ± 6.0  |
| LAD06S20-25 | 0.37 | 0.0534 ± 0.0013 | 0.04362 ± 0.00228 | 0.3214 ± 0.0185 | conc. | 275 ± 14     | 283 ± 16    |
| LAD06S20-26 | 1.17 | 0.0500 ± 0.0023 | 0.01299 ± 0.00068 | 0.0896 ± 0.0062 | conc. | 83.2 ± 4.4   | 87.1 ± 6.1  |
| LAD06S20-27 | 0.97 | 0.0495 ± 0.0023 | 0.01140 ± 0.00060 | 0.0778 ± 0.0054 | conc. | 73.1 ± 3.8   | 76.1 ± 5.3  |
| LAD06S20-28 | 0.59 | 0.0492 ± 0.0037 | 0.01078 ± 0.00058 | 0.0731 ± 0.0067 | conc. | 69.1 ± 3.7   | 71.7 ± 6.6  |
| LAD06S20-29 | 0.54 | 0.0962 ± 0.0028 | 0.01828 ± 0.00096 | 0.2425 ± 0.0145 | -72   | 116.8 ± 6.1  | 220 ± 13    |
| LAD06S20-30 | 0.29 | 0.0532 ± 0.0105 | 0.00759 ± 0.00044 | 0.0557 ± 0.0115 | conc. | 48.7 ± 2.8   | 55 ± 11     |
| LAD06S20-31 | 0.72 | 0.0487 ± 0.0018 | 0.01769 ± 0.00093 | 0.1187 ± 0.0076 | conc. | 113.1 ± 5.9  | 113.9 ± 7.3 |
| LAD06S20-32 | 0.44 | 0.0534 ± 0.0032 | 0.01959 ± 0.00104 | 0.1442 ± 0.0115 | conc. | 125.0 ± 6.6  | 137 ± 11    |
| LAD06S20-33 | 0.55 | 0.0477 ± 0.0019 | 0.01570 ± 0.00033 | 0.1032 ± 0.0046 | conc. | 100.4 ± 2.1  | 99.7 ± 4.4  |
| LAD06S20-34 | 1.10 | 0.0477 ± 0.0064 | 0.00485 ± 0.00013 | 0.0319 ± 0.0044 | conc. | 31.17 ± 0.87 | 31.9 ± 4.3  |
| LAD06S20-35 | 0.47 | 0.0522 ± 0.0027 | 0.01904 ± 0.00042 | 0.1370 ± 0.0076 | conc. | 121.6 ± 2.7  | 130.4 ± 7.3 |
| LAD06S20-36 | 0.67 | 0.0794 ± 0.0576 | 0.00071 ± 0.00006 | 0.0077 ± 0.0056 | conc. | 4.54 ± 0.37  | 7.8 ± 5.7   |
| LAD06S20-37 | 0.63 | 0.0474 ± 0.0018 | 0.01941 ± 0.00041 | 0.1268 ± 0.0054 | conc. | 123.9 ± 2.6  | 121.3 ± 5.2 |
| LAD06S20-38 | 1.10 | 0.0517 ± 0.0013 | 0.04264 ± 0.00088 | 0.3039 ± 0.0100 | conc. | 269.1 ± 5.6  | 269.4 ± 8.9 |
| LAD06S20-39 | 0.87 | 0.0619 ± 0.0035 | 0.01552 ± 0.00036 | 0.1325 ± 0.0080 | -17   | 99.3 ± 2.3   | 126.3 ± 7.6 |
| LAD06S20-40 | 0.73 | 0.0517 ± 0.0012 | 0.04208 ± 0.00086 | 0.3002 ± 0.0093 | conc. | 265.7 ± 5.4  | 266.5 ± 8.2 |
| LAD06S20-41 | 2.21 | 0.0806 ± 0.0436 | 0.00063 ± 0.00004 | 0.0070 ± 0.0038 | conc. | 4.04 ± 0.28  | 7.0 ± 3.8   |
| LAD06S20-42 | 0.28 | 0.0450 ± 0.0039 | 0.01652 ± 0.00035 | 0.1025 ± 0.0091 | conc. | 105.6 ± 2.2  | 99.0 ± 8.8  |
| LAD06S20-43 | 0.38 | 0.0483 ± 0.0018 | 0.01770 ± 0.00031 | 0.1180 ± 0.0050 | conc. | 113.1 ± 2.0  | 113.2 ± 4.8 |
| LAD06S20-44 | 1.22 | 0.0544 ± 0.0027 | 0.04231 ± 0.00079 | 0.3176 ± 0.0170 | conc. | 267.1 ± 5.0  | 280 ± 15    |
| LAD06S20-45 | 0.12 | 0.0867 ± 0.0015 | 0.20957 ± 0.00337 | 2.5042 ± 0.0592 | conc. | 1227 ± 20    | 1273 ± 30   |
| LAD06S20-46 | 0.50 | 0.0517 ± 0.0016 | 0.04397 ± 0.00074 | 0.3133 ± 0.0109 | conc. | 277.4 ± 4.7  | 276.7 ± 9.6 |
| LAD06S20-47 | 1.16 | 0.0624 ± 0.0059 | 0.01638 ± 0.00039 | 0.1409 ± 0.0137 | -13   | 104.7 ± 2.5  | 134 ± 13    |
| LAD06S20-48 | 0.75 | 0.0504 ± 0.0048 | 0.01152 ± 0.00026 | 0.0800 ± 0.0078 | conc. | 73.8 ± 1.7   | 78.2 ± 7.7  |
| LAD06S20-49 | 0.80 | 0.0525 ± 0.0045 | 0.01528 ± 0.00033 | 0.1105 ± 0.0098 | conc. | 97.8 ± 2.1   | 106.4 ± 9.4 |
| LAD06S20-50 | 0.44 | 0.0993 ± 0.0582 | 0.00173 ± 0.00016 | 0.0237 ± 0.0140 | conc. | 11.1 ± 1.0   | 24 ± 14     |

\* Percentage of <sup>206</sup>Pb contributed by common Pb on the basis of <sup>204</sup>Pb. Value of common Pb was assumed by Stacey and Kramers (1975) model; n.d. : no detection of <sup>204</sup>Pb.

\*\* Degree of discordance (%); negative numbers and blanks show normal discordant and concordant within 2σ of the analytical error, respectively.
